# Supplementary material for: An Insight into the Flammability of Some Bio-Based Polyesters
Source: MDPI journal article supplement (doi:10.3390/polym9120706), 2017-12-12
Supplement: s1 [file s1]

### Supporting information

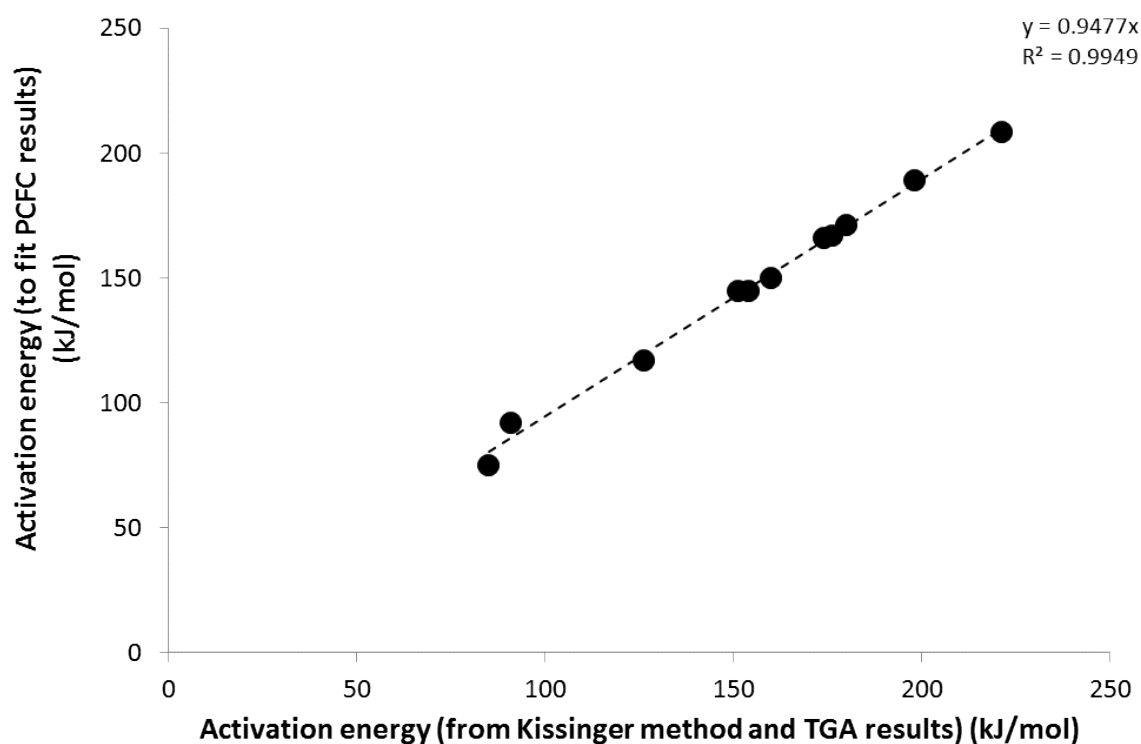

Figure S1 – Comparison between activation energies calculated from TGA data using Kissinger's method and activation energies used to fit PCFC results

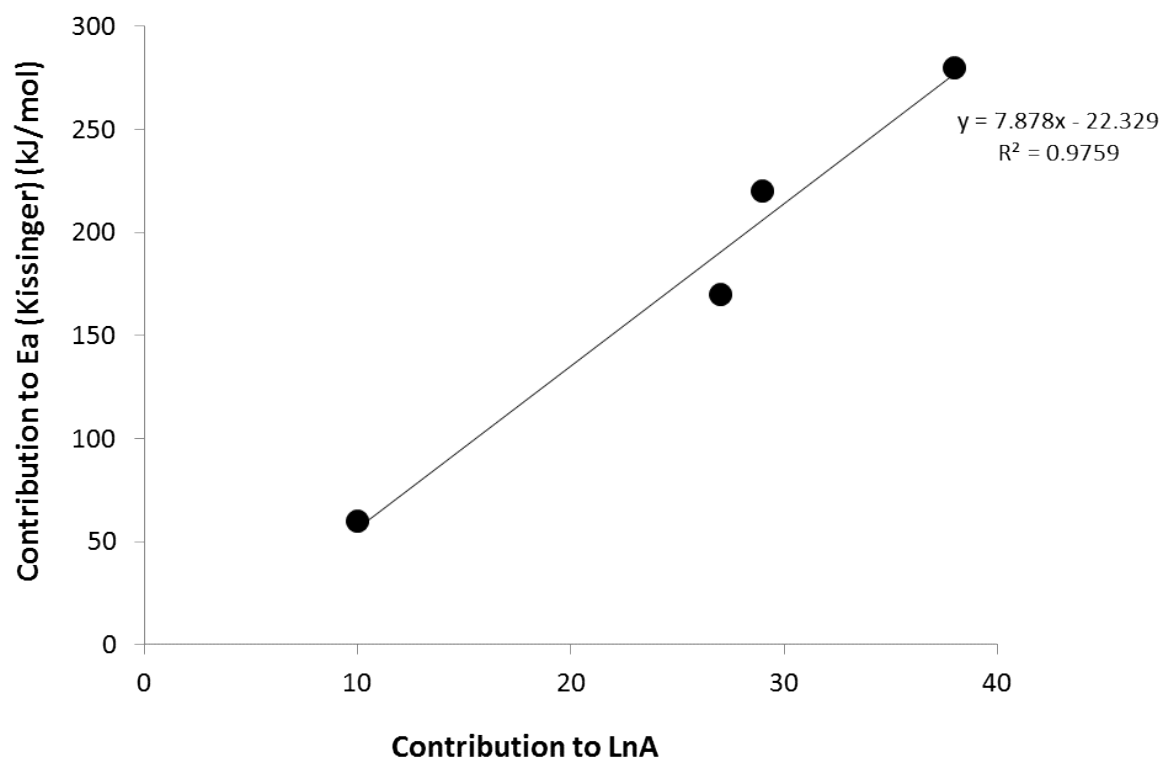

Figure S2 – Correlation between the contributions to activation energy and frequency factor

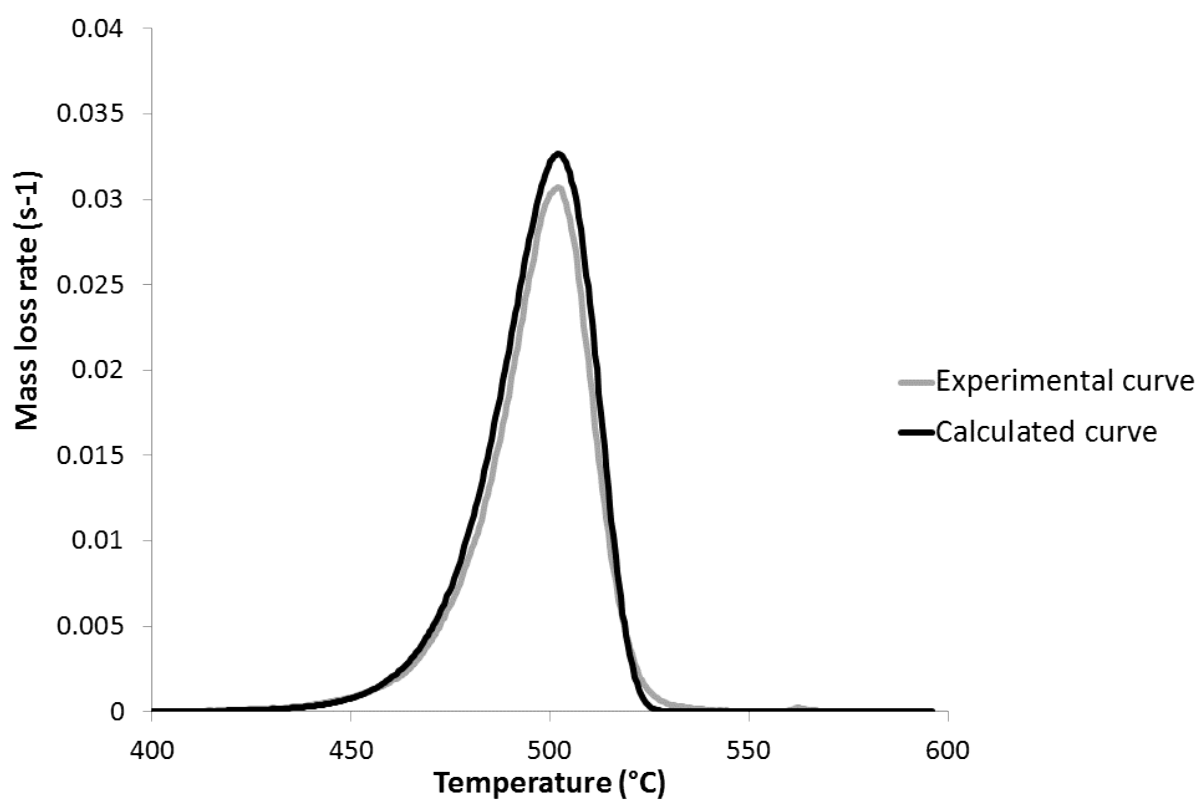

Figure S3 – Experimental versus calculated mass loss rate curves for PE at 1 K/s

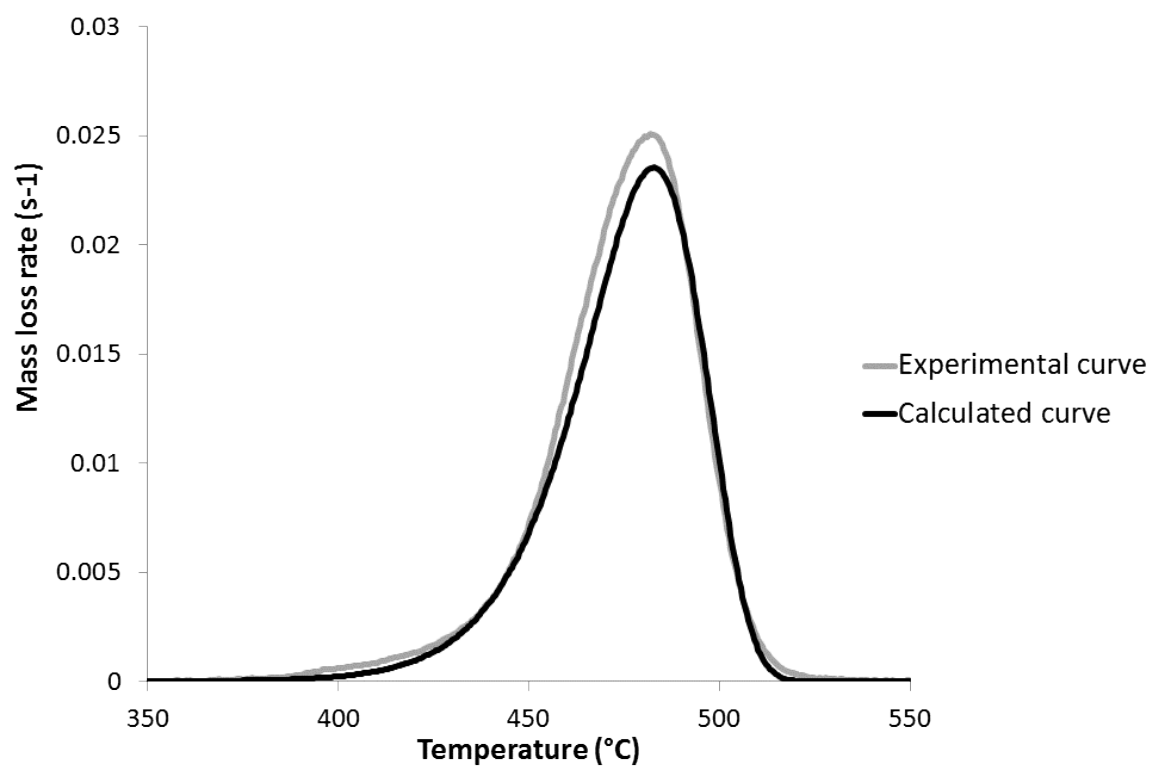

Figure S4 – Experimental versus calculated mass loss rate curves for PP at 1 K/s

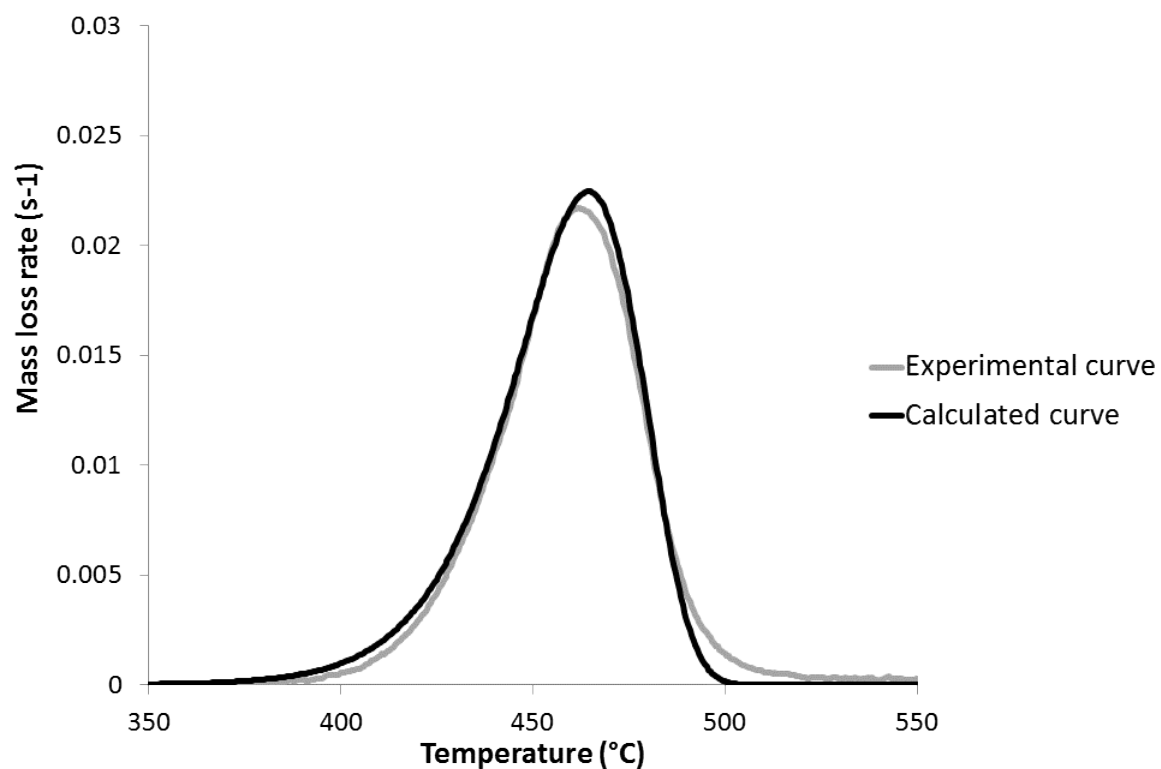

Figure S5 – Experimental versus calculated mass loss rate curves for PET at 1 K/s

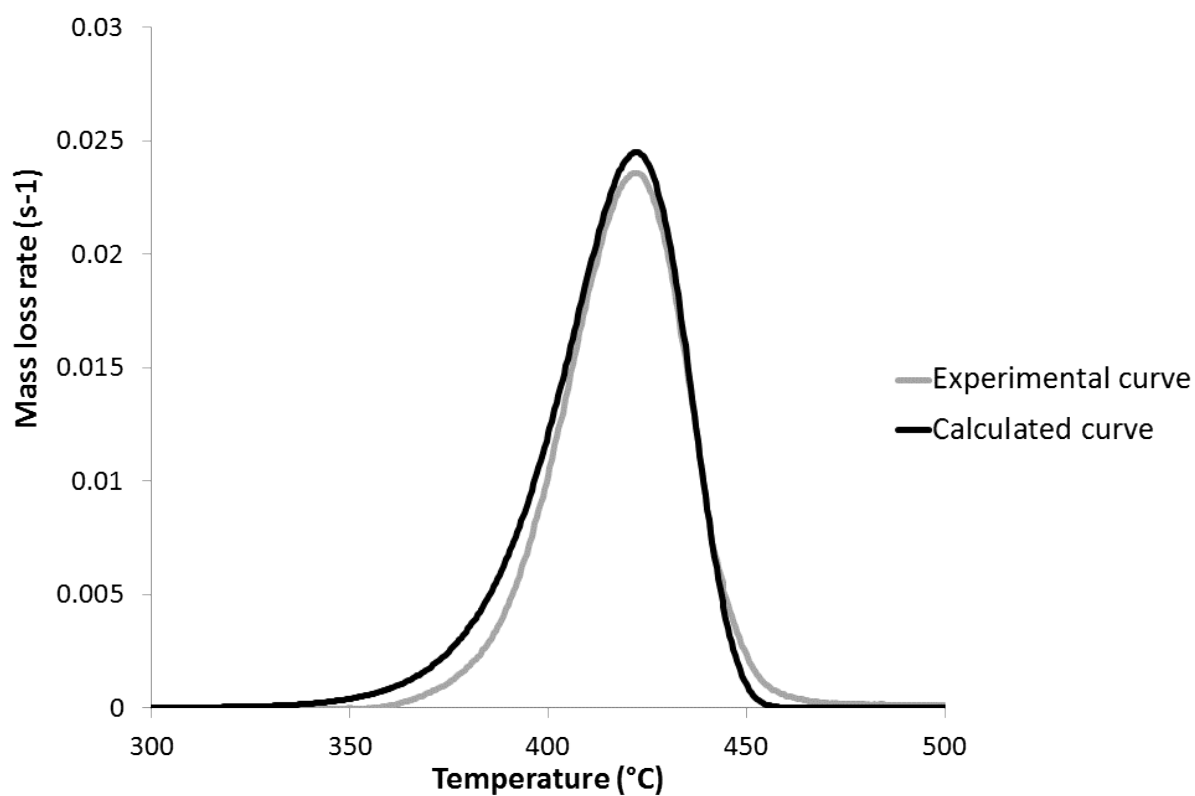

Figure S6 – Experimental versus calculated mass loss rate curves for PBT at 1 K/s

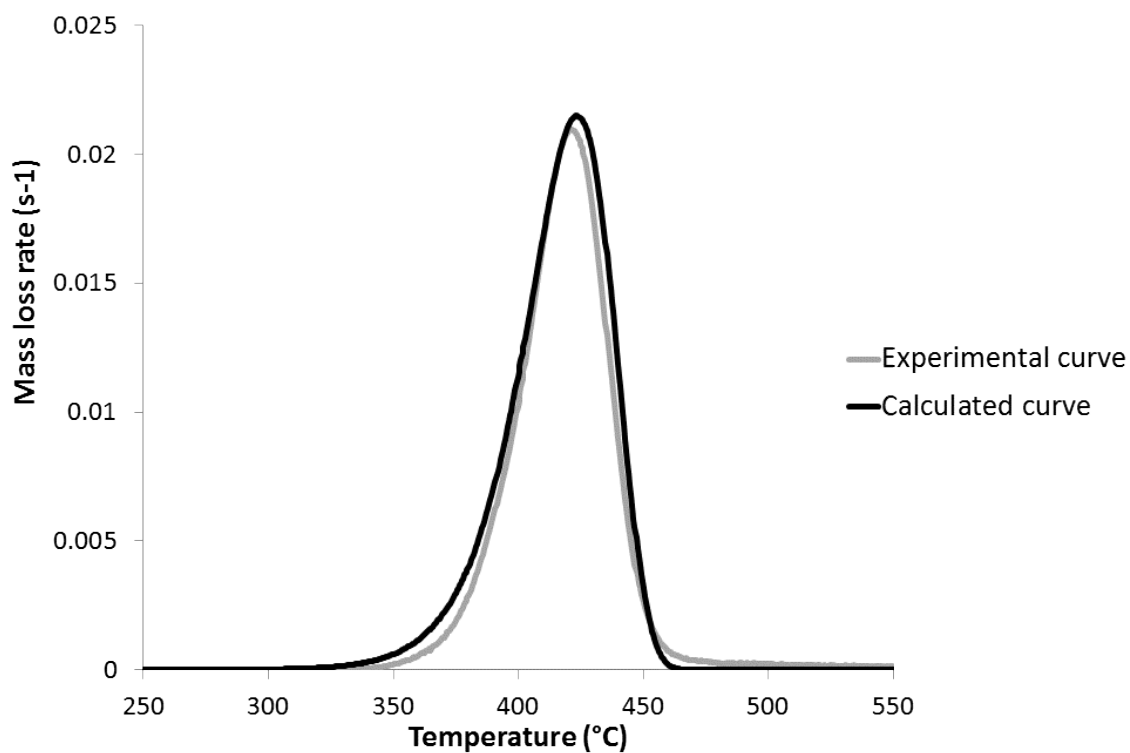

Figure S7 – Experimental versus calculated mass loss rate curves for PBS at 1 K/s

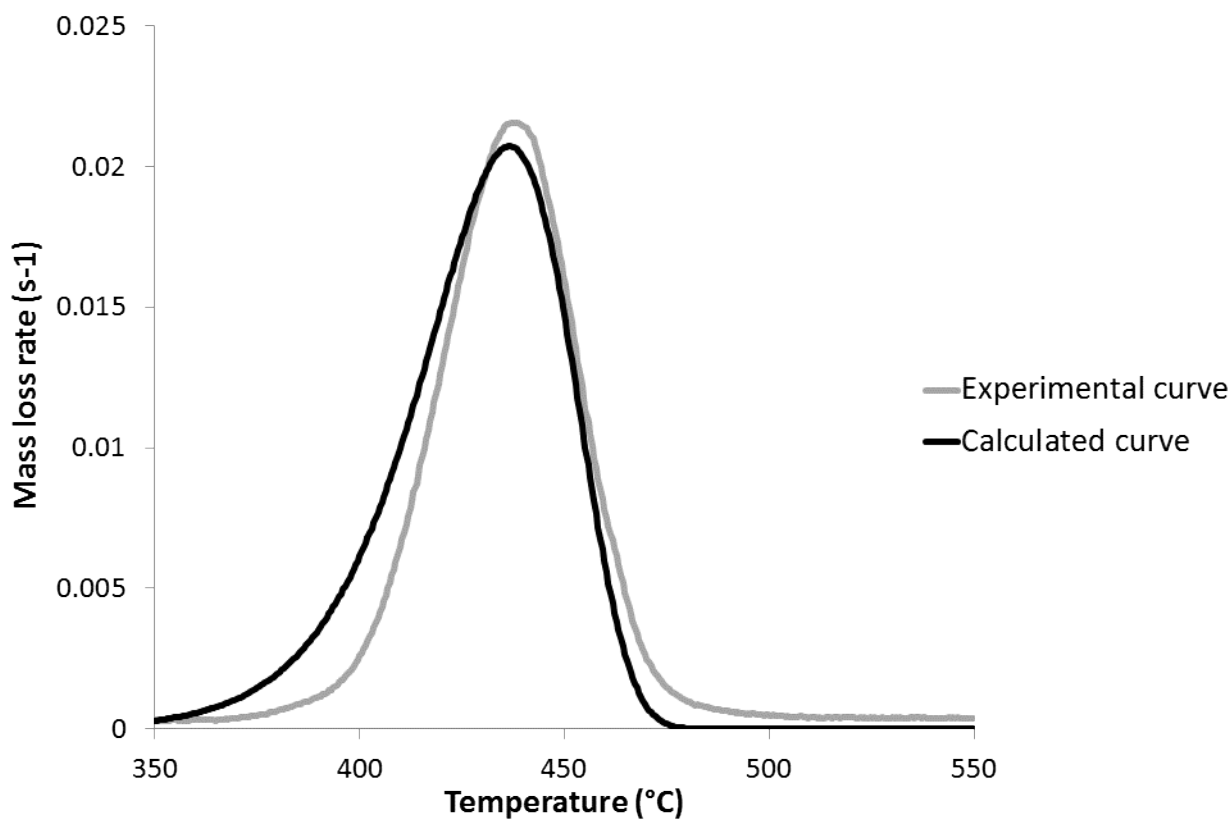

Figure S8 – Experimental versus calculated mass loss rate curves for PCL at 1 K/s

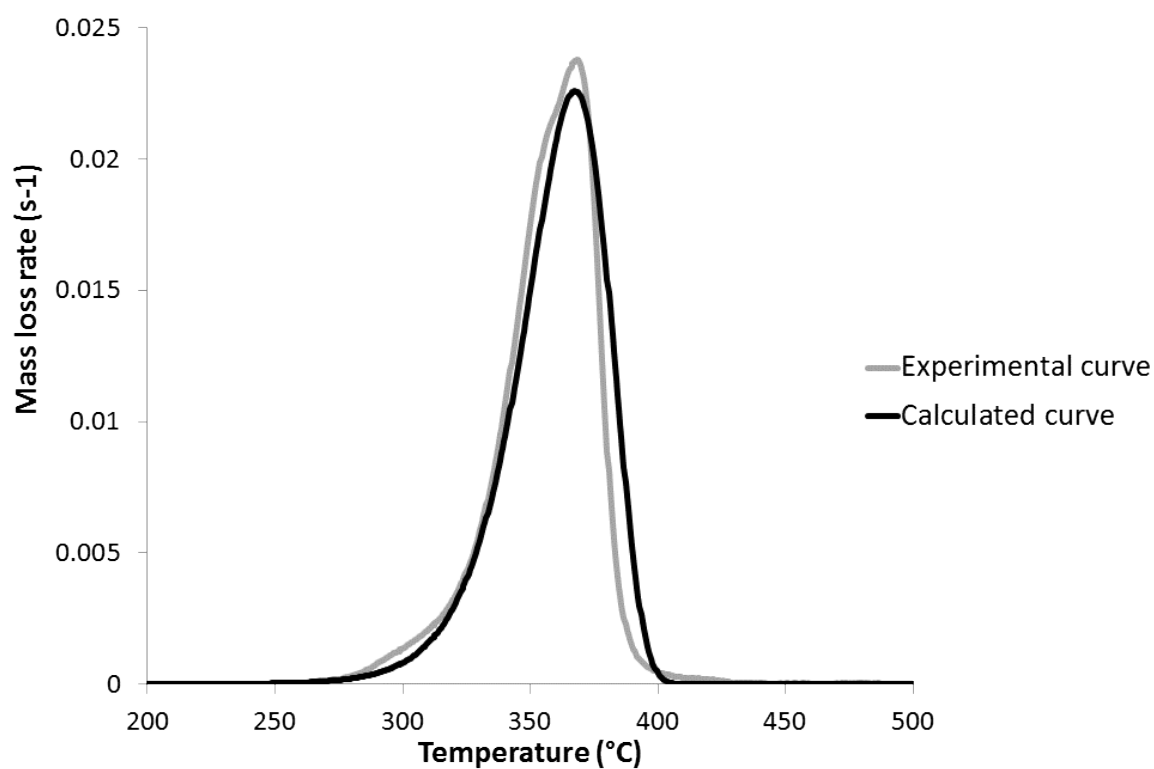

Figure S9 – Experimental versus calculated mass loss rate curves for PG at 1 K/s

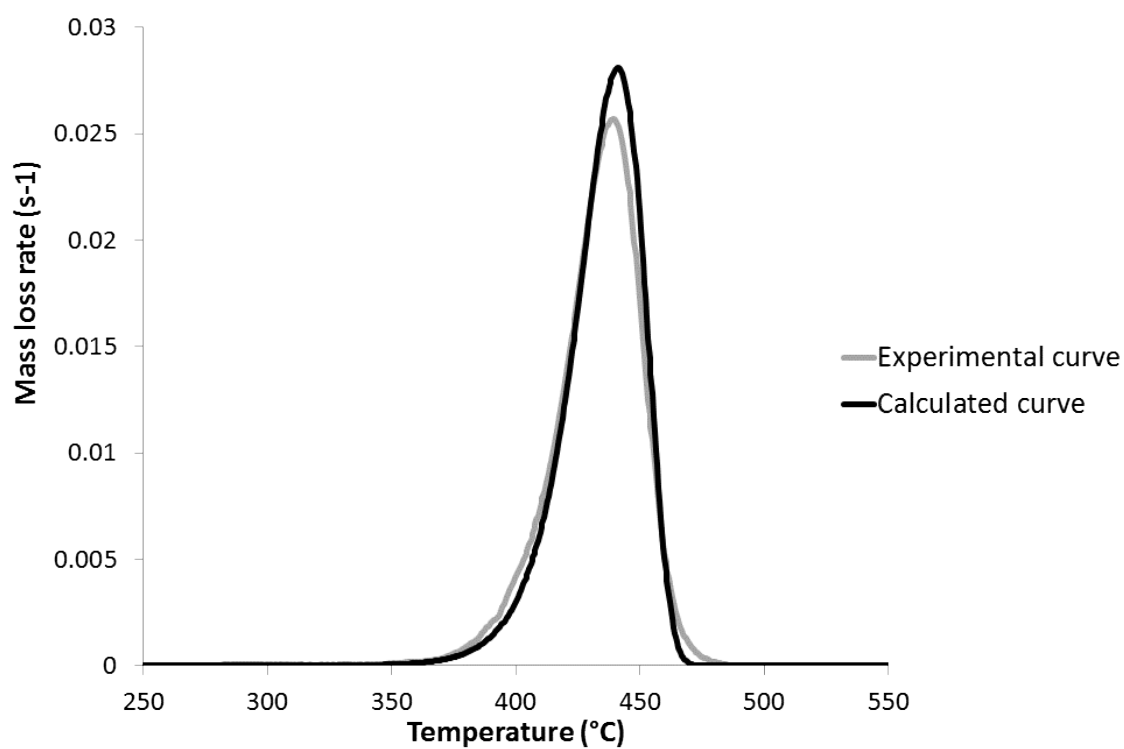

Figure S10 – Experimental versus calculated mass loss rate curves for PS at 1 K/s

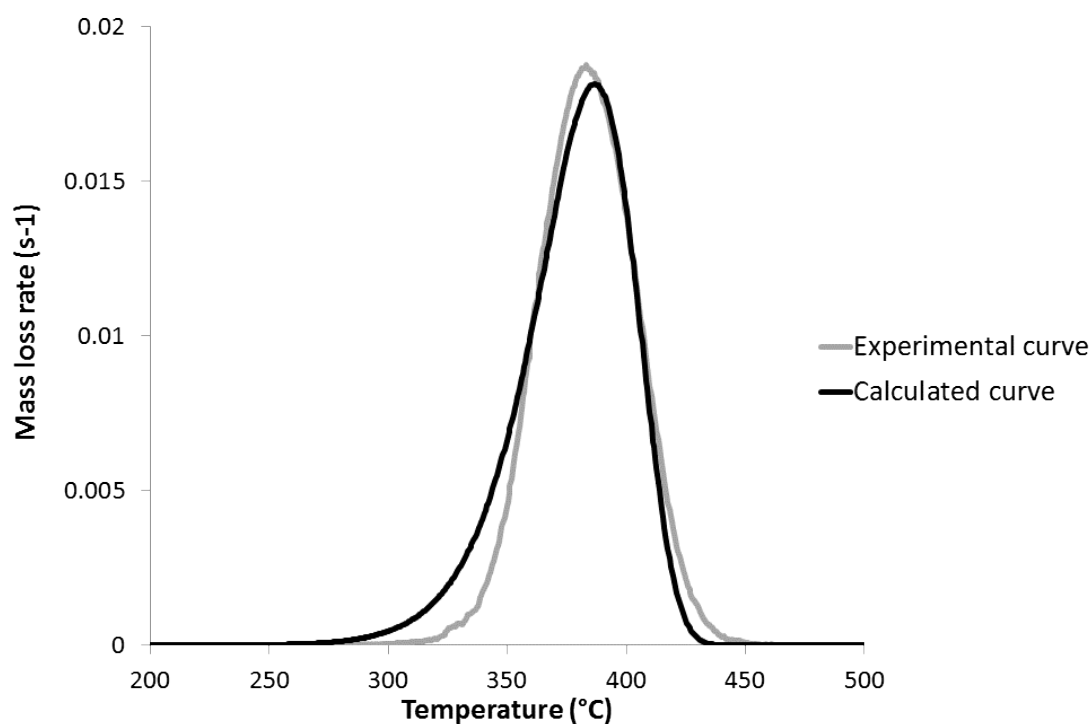

Figure S11 – Experimental versus calculated mass loss rate curves for PMMA at 1 K/s

Table S1 – Activation energies from literature for studied polymers

| Polymère | Flynn-Wall-Ozawa method |       |       |       | Kissinger method           | Reference |
|----------|-------------------------|-------|-------|-------|----------------------------|-----------|
|          | E <sub>a</sub> (kJ/mol) |       |       |       | E <sub>a</sub><br>(kJ/mol) |           |
|          | α=0.2                   | α=0.4 | α=0.6 | α=0.8 |                            |           |
| HDPE     | 236                     | 248   | 252   | 250   |                            | 3         |
| PP       | 170                     | 182   | 192   | 194   |                            | 3         |
| PP       | 176                     | 195   | 202   | 207   |                            | 8         |
| PP       |                         |       |       |       | 69                         | 9         |
| PLA      | 161                     | 177   | 182   | 184   |                            | 2         |
| PLA      |                         |       |       |       | 171                        | 5         |
| PLA      |                         |       |       |       | 105                        | 6         |
| PCL      | 144                     | 179   | 187   | 191   |                            | 1         |
| PCL      |                         |       |       |       | 196                        | 1         |
| PBS      | 118                     | 139   | 155   | 164   |                            | 1         |
| PBS      |                         |       |       |       | 176                        | 1         |
| PHB      | 133                     | 136   | 136   | 135   |                            | 4         |
| PHB      |                         |       |       |       | 131                        | 4         |
| PHB      |                         |       |       |       | 99                         | 7         |

1 - Benarbia Abderrahim, Elidrissi Abderrahman, Aqil Mohamed, Tabaght Fatima, Tahani Abdesselam, Ouassini Krim, Kinetic Thermal Degradation of Cellulose, Polybutylene Succinate and a Green Composite: Comparative Study, World Journal of Environmental Engineering, 2015, Vol. 3, No. 4, 95-110

- 2 - Hantao Zou, Changhai Yi, Luoxin Wang, Hongtao Liu, Weilin Xu, Thermal degradation of poly(lactic acid) measured by thermogravimetry coupled to Fourier transform infrared spectroscopy, *J Therm Anal Calorim* (2009) 97:929–935
- 3 - A. Aboulkas, K. El harfi, A. El Bouadili, Thermal degradation behaviors of polyethylene and polypropylene. Part I: Pyrolysis kinetics and mechanisms, *Energy Conversion and Management* 51 (2010) 1363–1369
- 4 - Matko Erceg, Tonka Kovačić, Ivka Klaric, Dynamic thermogravimetric degradation of poly(3-hydroxybutyrate)/aliphaticaromatic copolyester blends, *Polymer Degradation and Stability* 90 (2005)
- 5 - F. Carrasco, L.A. Pérez-Maqueda, P.E. Sánchez-Jiménez, A. Perejón, Enhanced general analytical equation for the kinetics of the thermal degradation of poly(lactic acid) driven by random scission, *Polymer Testing* 32 (2013) 937–945
- 6 - Isinay E. Yuzay, Rafael Auras, Herlinda Soto-Valdez, Susan Selke, Effects of synthetic and natural zeolites on morphology and thermal, *Polymer Degradation and Stability* 95 (2010) 1769-1777
- 7 - Dimitris S. Achilias, Elpiniki Panayotidou, Ioannis Zuburtikudis, Thermal degradation kinetics and isoconversional analysis of biodegradable poly(3-hydroxybutyrate)/organomodified montmorillonite nanocomposites, *Thermochimica Acta* 514 (2011) 58–66
- 8 - De-Yi Wang, Amit Das, Andreas Leuteritz, Regine Boldt, Liane Häußler, Udo Wagenknecht, Gert Heinrich, Thermal degradation behaviors of a novel nanocomposite based, *Polymer Degradation and Stability* 96 (2011) 285-290
- 9 - Xuejun Lai, Jiedong Qiu, Hongqiang Li, Rimin Zhou, Huali Xie, Xingrong Zeng, Thermal degradation and combustion behavior of novel intumescent flame retardant polypropylene with N-alkoxy hindered amine, *Journal of Analytical and Applied Pyrolysis* 120 (2016) 361–370
